# Supplementary material
Source: ML conference proceedings conference paper supplement (https://openaccess.thecvf.com/content/CVPR_2020/html/Wu_Self-Supervised_Domain-Aware_Generative_CVPR_2020_paper.html)
Supplement: Supplementary file 4 [file Wu_Self-Supervised_Domain-Aware_Generative_CVPR_2020_supplemental.zip]

# Cross-Domain Feature Generating Module

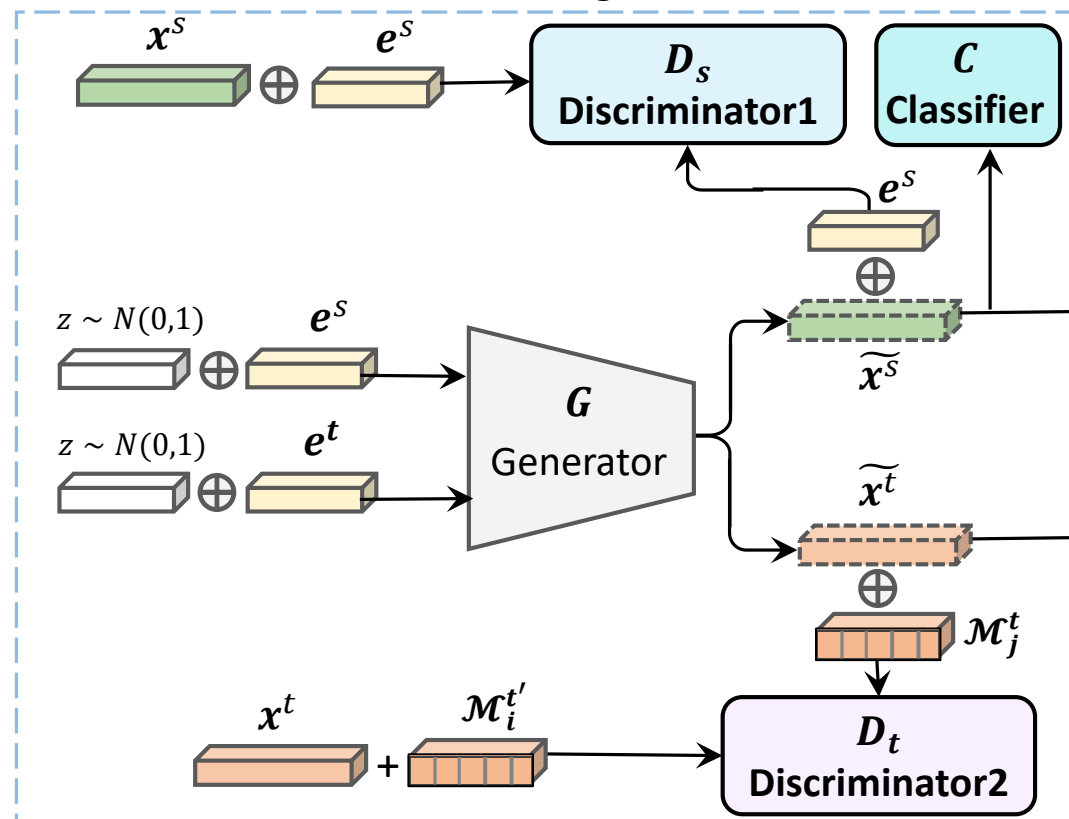

# Self-supervised Learning Module

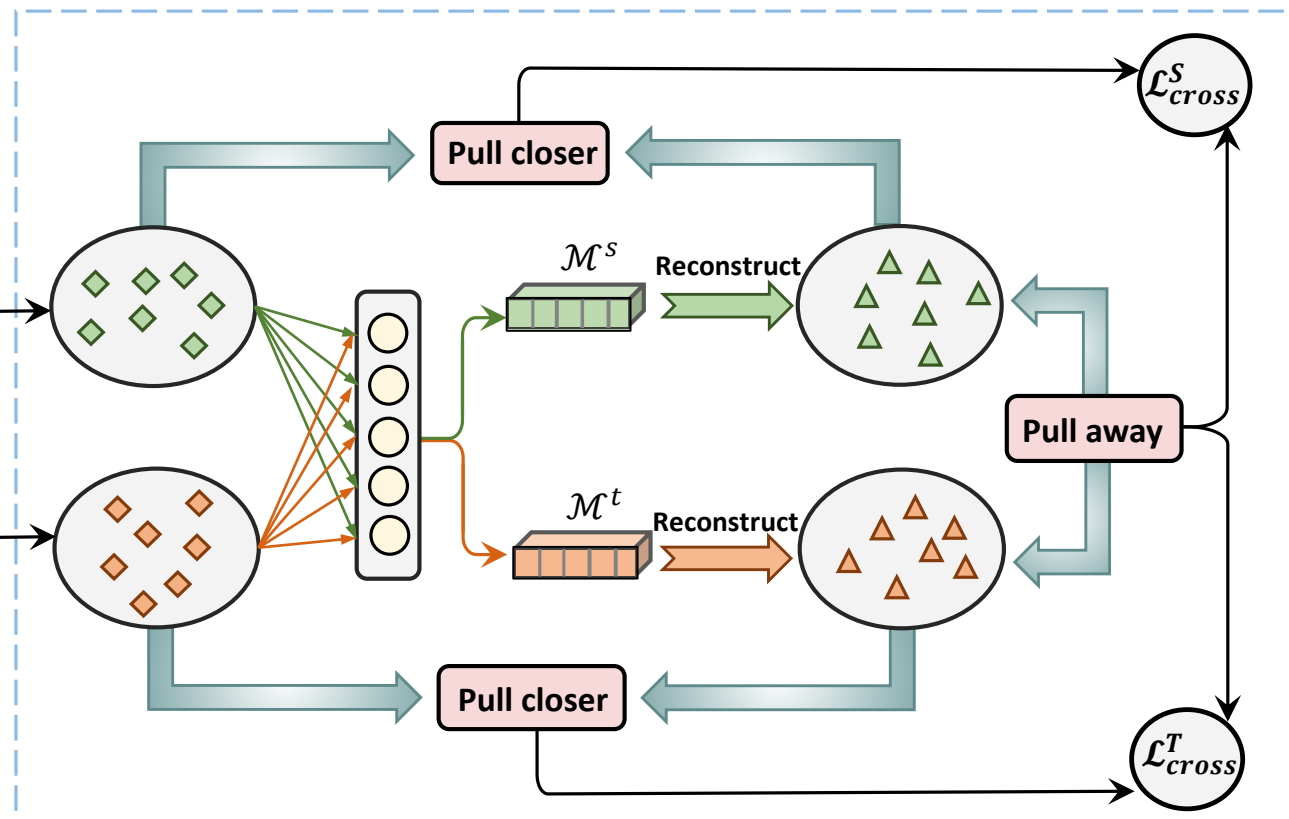

◆ Source synthesized feature  $\tilde{x}^s$  ▲ Source reconstructed feature  $x^{rs}$  ◆ Target synthesized feature  $\tilde{x}^t$  ▲ Target reconstructed feature  $x^{rt}$  ○ anchor  $A$   $\oplus$  concatenation
