# Supplementary material
Source: ML conference proceedings conference paper supplement (https://openaccess.thecvf.com/content/CVPR_2020/html/Wu_Self-Supervised_Domain-Aware_Generative_CVPR_2020_paper.html)

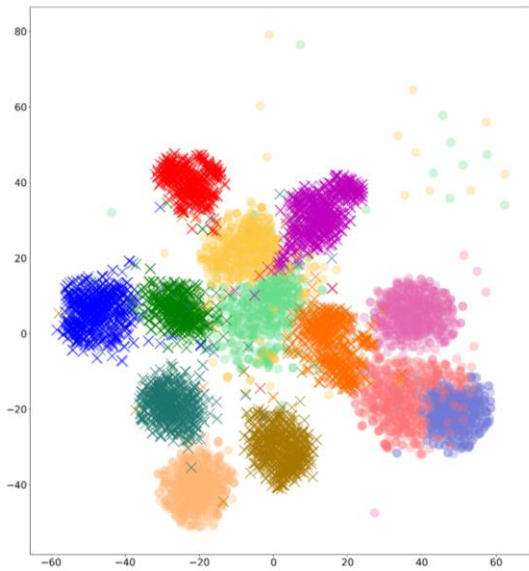

(c)

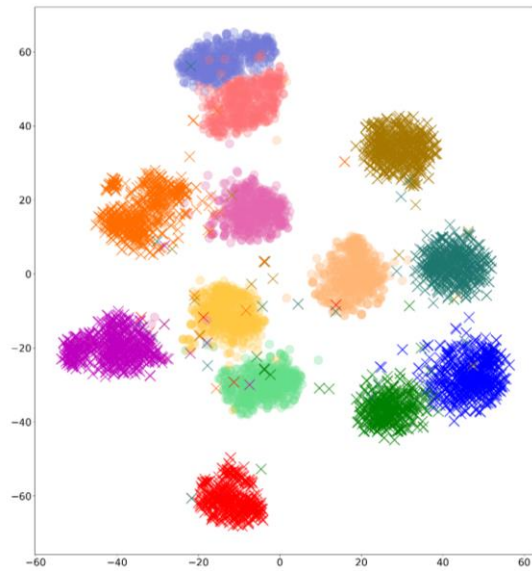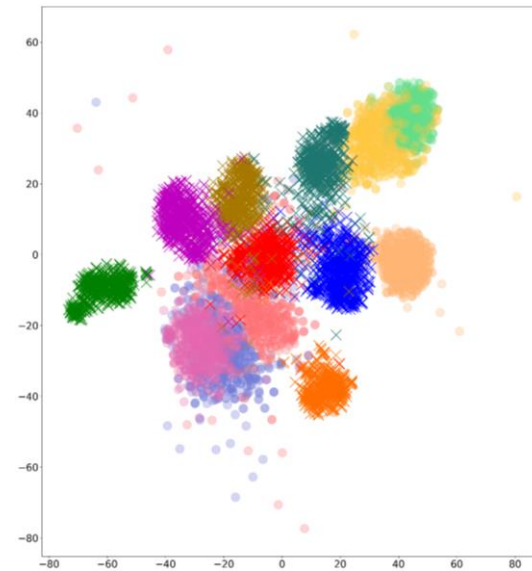

(d)

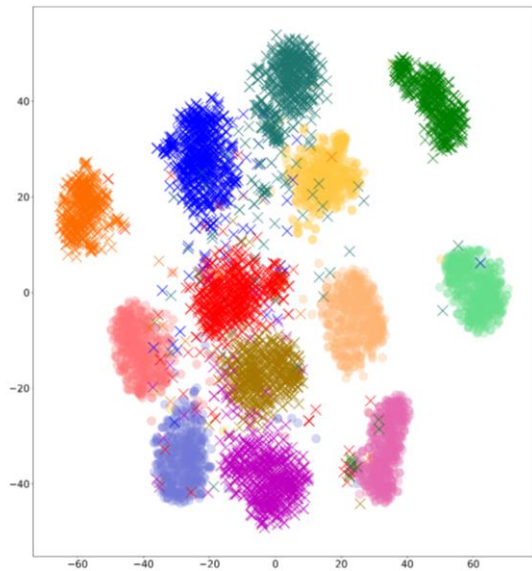

Supplement: Supplementary file 1 [file Wu_Self-Supervised_Domain-Aware_Generative_CVPR_2020_supplemental.zip]

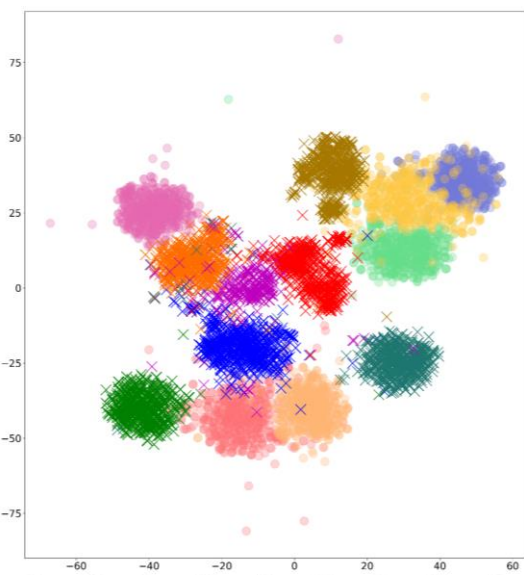

(i)

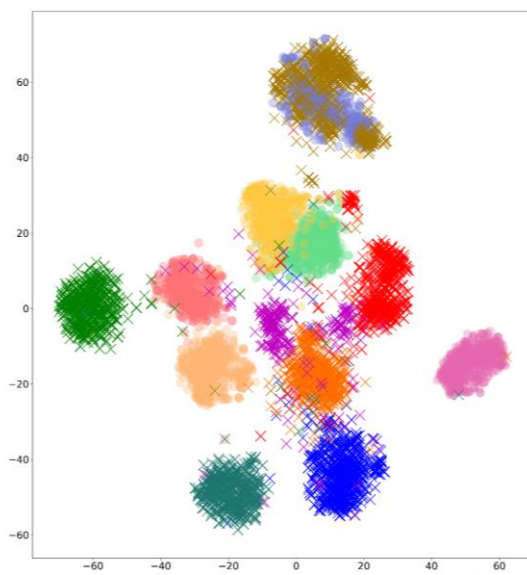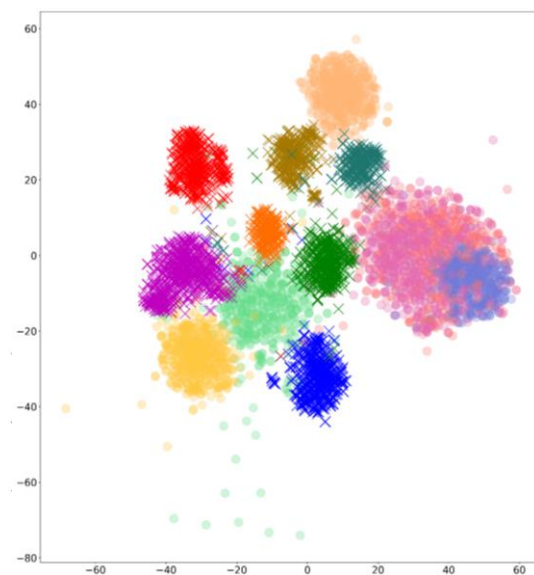

(j)

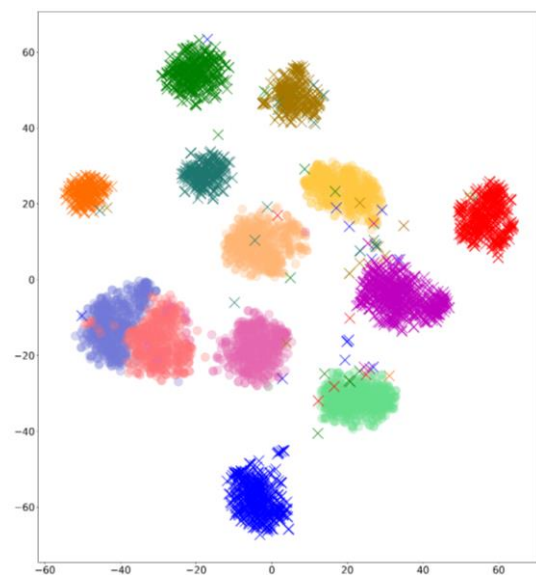

Supplement: Supplementary file 2 [file Wu_Self-Supervised_Domain-Aware_Generative_CVPR_2020_supplemental.zip]

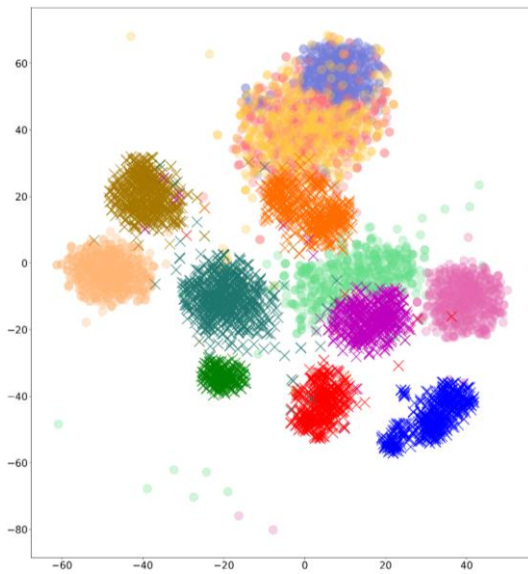

(e)

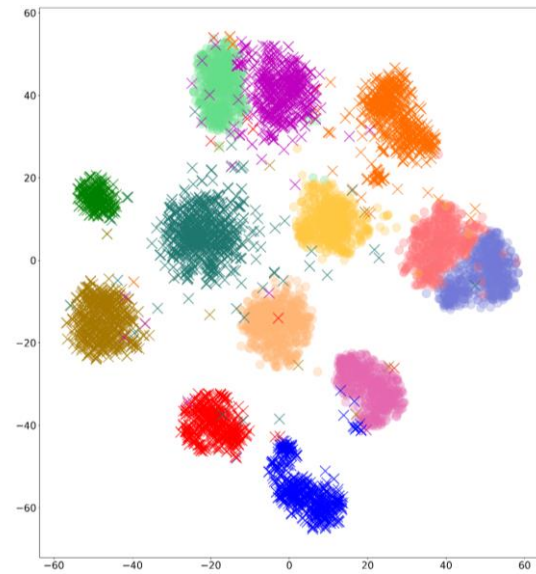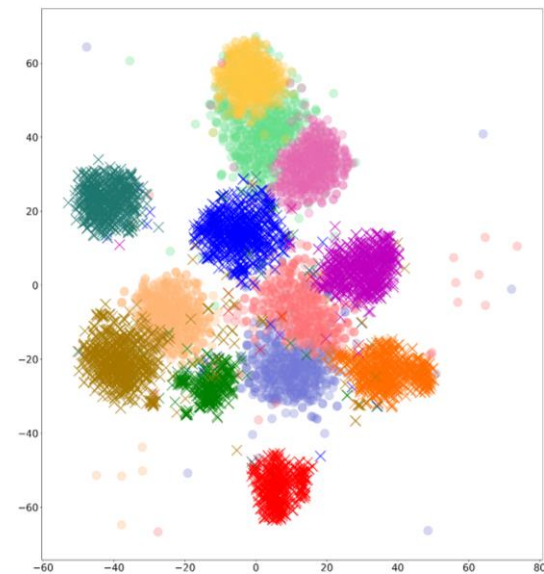

(f)

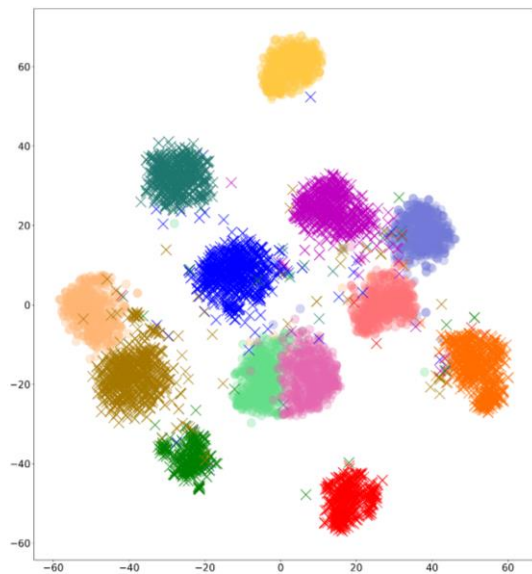

Supplement: Supplementary file 3 [file Wu_Self-Supervised_Domain-Aware_Generative_CVPR_2020_supplemental.zip]

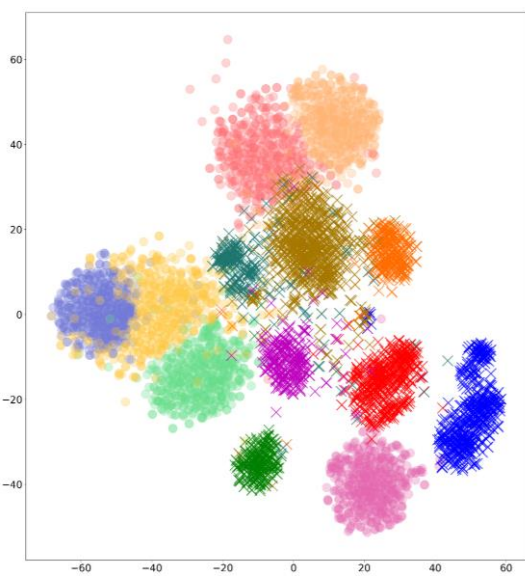

(g)

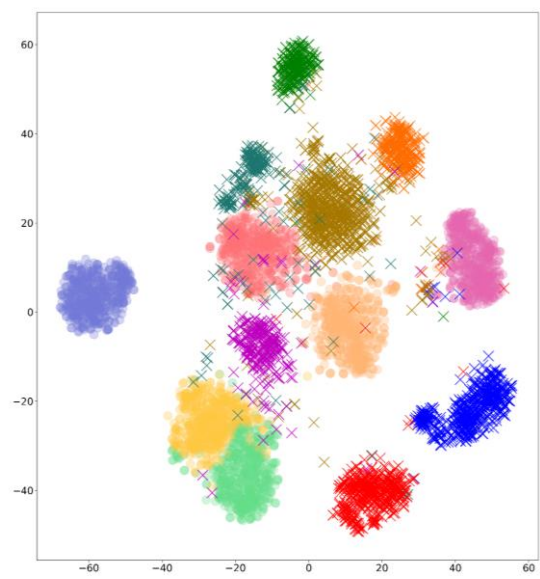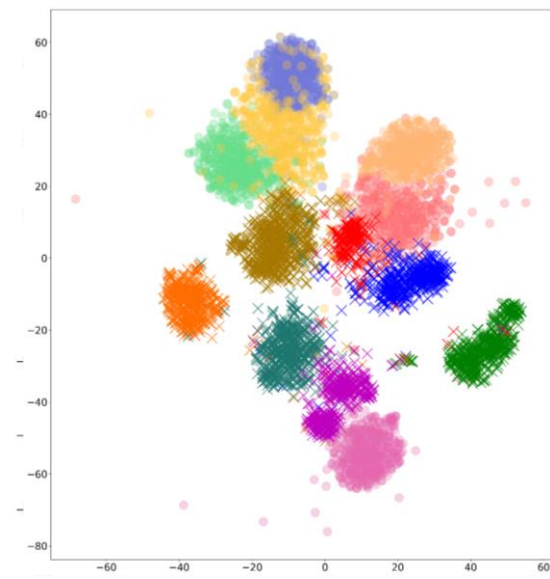

(h)

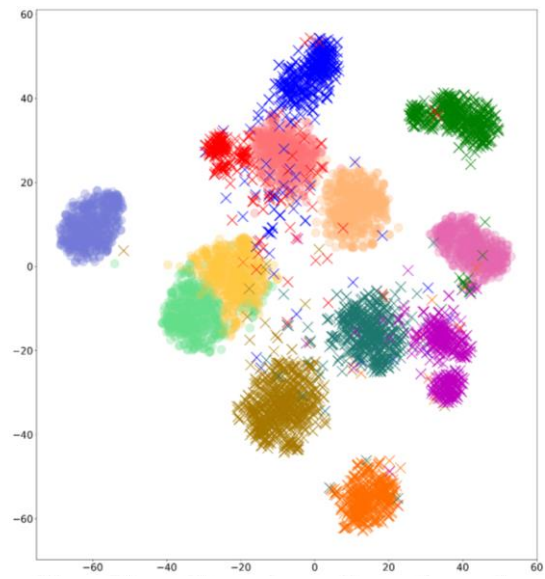

Supplement: Supplementary file 5 [file Wu_Self-Supervised_Domain-Aware_Generative_CVPR_2020_supplemental.zip]

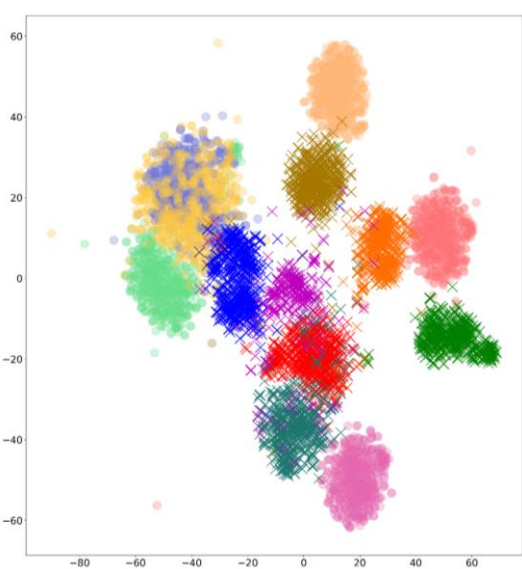

(a)

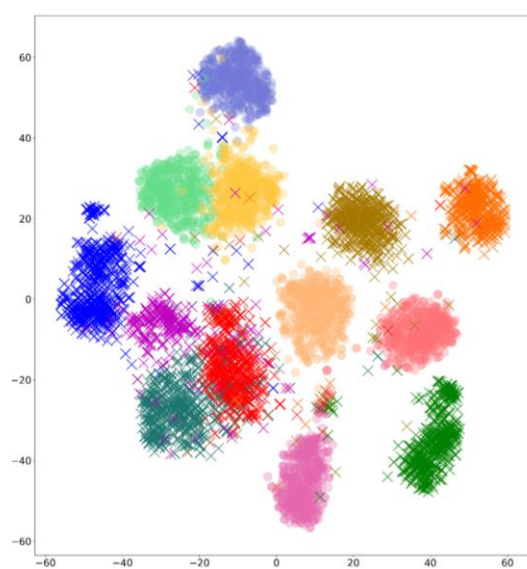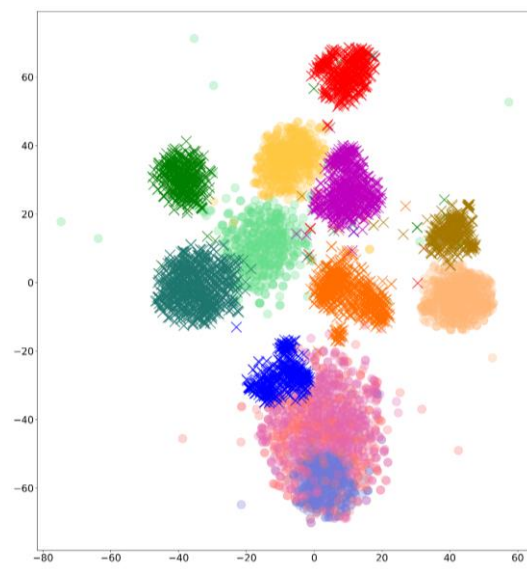

(b)

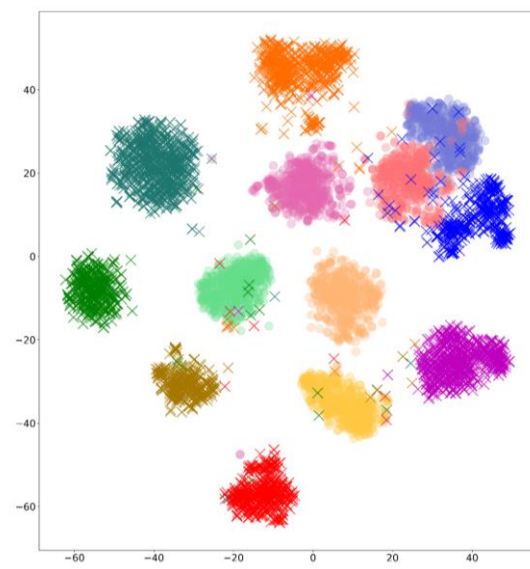

Supplement: Supplementary file 6 [file Wu_Self-Supervised_Domain-Aware_Generative_CVPR_2020_supplemental.zip]
